# Supplementary material for: The spread of a wild plant pathogen is driven by the road network
Source: PLOS journal article supplement (doi:10.1371/journal.pcbi.1007703), 2020-03-31
Supplement: S4 (10.1371/journal.pcbi.1007703.s004) [file journal.pcbi.1007703.s004]

# Supporting information "The spread of a wild plant pathogen is driven by the road network"

Elina Numminen\* & Anna-Liisa Laine

\* elina.numminen@helsinki.fi

## S3 Table

| Model    | Abundance | Pathogen connectivity | Host Connectivity | Betweenness | Closeness | Host coverage | WAIC    |
|----------|-----------|-----------------------|-------------------|-------------|-----------|---------------|---------|
| Model 1  | x         | x                     | x                 | x           | x         | x             | 7954.24 |
| Model 2  | x         | x                     | x                 | x           |           | x             | 7978.72 |
| Model 3  | x         | x                     | x                 |             | x         | x             | 8011.68 |
| Model 4  | x         | x                     |                   | x           | x         | x             | 7919.86 |
| Model 5  | x         |                       | x                 | x           | x         | x             | 7932.27 |
| Model 6  | x         |                       |                   | x           | x         | x             | 7938.95 |
| Model 7  | x         | x                     | x                 |             |           | x             | 8021.96 |
| Model 8  | x         |                       |                   | x           |           | x             | 7951.90 |
| Model 9  | x         |                       |                   |             | x         | x             | 7974.06 |
| Model 10 | x         | x                     |                   |             |           | x             | 7980.15 |
| Model 11 | x         |                       | x                 |             |           | x             | 7970.00 |
| Model 12 | x         |                       |                   |             |           | x             | 7989.35 |

**Table 1.** The computed WAICs for presence-absence models with different predictors, 'x' denoting that the covariate was included in the model.
